# Supplementary material for: An Algorithm for the Development of a Recombinant Antiherpetic Subunit Vaccine Combining the Crystal Structure Analysis, AlphaFold2-Based Modeling, and Immunoinformatics
Source: MDPI journal article supplement (doi:10.3390/cryst13101416), 2023-09-24
Supplement: s1 [file s1]

# An algorithm for the development of a recombinant antiherpetic subunit vaccine combining the crystal structure analysis, AlphaFold2-based modeling, and immunoinformatics.

Tatiana V. Rakitina<sup>1,2\*</sup>, Evgeniya V. Smirnova<sup>2</sup>, David D. Podshivalov<sup>1,3,4</sup>, Vladimir I. Timofeev<sup>1,3</sup>, Aleksandr S. Komolov<sup>1</sup>, Anna V. Vlaskina<sup>1</sup>, Tatiana N. Gaeva<sup>1</sup>, Raif G. Vasilov<sup>1</sup>, Yulia A. Dyakova<sup>1</sup>, and Mikhail V. Kovalchuk<sup>1</sup>

## Supplementary Materials

Table S1. T-cell epitopes.

| ID  | Sequence   | aff    | aff_rescale | cle    | tap    | COMB   |
|-----|------------|--------|-------------|--------|--------|--------|
| 456 | LSNTLAELY  | 0.7225 | 3.0676      | 0.6037 | 2.9230 | 3.3043 |
| 387 | SSDAISTTF  | 0.5513 | 2.3407      | 0.9717 | 2.3470 | 2.6038 |
| 802 | QSNPMKALY  | 0.5483 | 2.3278      | 0.7832 | 2.9320 | 2.5919 |
| 306 | GSHTETSYS  | 0.4419 | 1.8764      | 0.9758 | 2.6490 | 2.1552 |
| 641 | FTFGGGYVY  | 0.3386 | 1.4376      | 0.9636 | 2.8680 | 1.7255 |
| 789 | AAAFFAFRY  | 0.3069 | 1.3032      | 0.9702 | 3.1860 | 1.6080 |
| 142 | YTEGIAVVF  | 0.2924 | 1.2414      | 0.8376 | 2.4900 | 1.4915 |
| 724 | HADANAAMF  | 0.3038 | 1.2901      | 0.4188 | 2.3290 | 1.4693 |
| 288 | VLATGDFVY  | 0.2715 | 1.1529      | 0.9467 | 2.9180 | 1.4408 |
| 311 | HTSYAADRF  | 0.2865 | 1.2164      | 0.1658 | 2.2510 | 1.3538 |
| 589 | ISSRPGACY  | 0.2163 | 0.9182      | 0.9620 | 3.1160 | 1.2183 |
| 694 | IKDSGLLDY  | 0.2141 | 0.9091      | 0.9480 | 2.6540 | 1.1840 |
| 205 | GVCIRSTAKY | 0.1542 | 0.6547      | 0.9493 | 2.9940 | 0.9468 |
| 134 | PTRPEGQNY  | 0.1783 | 0.7571      | 0.3715 | 2.4650 | 0.9360 |
| 670 | FIDLNITML  | 0.1643 | 0.6977      | 0.9533 | 0.8220 | 0.8818 |
| 647 | YVYFEEYAY  | 0.1234 | 0.5240      | 0.9535 | 3.2000 | 0.8270 |
| 171 | SQVWFGHRY  | 0.1201 | 0.5099      | 0.9359 | 3.1780 | 0.8092 |
| 767 | VSSFMSNPF  | 0.1460 | 0.6198      | 0.3750 | 2.6030 | 0.8062 |
| 157 | YKFKATMY   | 0.1179 | 0.5006      | 0.9685 | 2.9210 | 0.7919 |
| 872 | LSAKVTDMV  | 0.1611 | 0.6839      | 0.5186 | 0.4240 | 0.7829 |

**Table S2.** Linear B-cell epitopes.

| N  | C<br>H<br>A<br>I<br>N | S<br>T<br>A<br>R<br>T | E<br>N<br>D | SEQUENCE                                                                                                               | L<br>E<br>N<br>G<br>T<br>H | S<br>C<br>O<br>R<br>E |
|----|-----------------------|-----------------------|-------------|------------------------------------------------------------------------------------------------------------------------|----------------------------|-----------------------|
| 1  | A                     | 713                   | 865         | DLRFADIDTVIHAVMGIVGGVVSASVSGVSSFFGALAVGLLVLAGLAAFFAFRYVMR<br>LQSNPMKALYPLTTKELEEGGDFDEAKLAEAREMIRYMALVSAMERTEHKAKK     | 110                        | 0.837                 |
| 2  | A                     | 555                   | 669         | VGRRVSARMLGDVMAVSTCVPAADNVIVQNSMRISSRPGACYSRPLVSFRYEDQGP<br>LVEGQLGENNELRLTRDAIEPCTVGHRRYFTFGGGYVYFEEYAYSHQLSRADITTVST | 115                        | 0.772                 |
| 3  | A                     | 104                   | 130         | IKAENTDANFYVCPPTGATVVQFEQP                                                                                             | 27                         | 0.698                 |
| 4  | A                     | 453                   | 492         | QPLLSNTLAELYVREHLREQSRKPSV                                                                                             | 26                         | 0.681                 |
| 5  | A                     | 422                   | 439         | DRIFARRYNATHIKVGQP                                                                                                     | 18                         | 0.63                  |
| 6  | A                     | 174                   | 180         | WFGHRY                                                                                                                 | 7                          | 0.62                  |
| 7  | A                     | 321                   | 341         | QVDGFYARDLTTKARATAPTT                                                                                                  | 21                         | 0.613                 |
| 8  | A                     | 301                   | 309         | YGYREGSHT                                                                                                              | 9                          | 0.548                 |
| 9  | A                     | 257                   | 262         | SRVEAF                                                                                                                 | 6                          | 0.537                 |
| 10 | A                     | 198                   | 205         | IDKINAKG                                                                                                               | 8                          | 0.53                  |

**Table S3. Conformational B-cell epitopes.**

| No. | Sequence                                                                                                                                                                                                                                                                                                                                                                                                                                                                                                                                                                                                                                                                                                                                                                                                                                                                                                                                                                                                                                                                                                                                                                                                                               | Length<br>(residues) | Score |
|-----|----------------------------------------------------------------------------------------------------------------------------------------------------------------------------------------------------------------------------------------------------------------------------------------------------------------------------------------------------------------------------------------------------------------------------------------------------------------------------------------------------------------------------------------------------------------------------------------------------------------------------------------------------------------------------------------------------------------------------------------------------------------------------------------------------------------------------------------------------------------------------------------------------------------------------------------------------------------------------------------------------------------------------------------------------------------------------------------------------------------------------------------------------------------------------------------------------------------------------------------|----------------------|-------|
| 1   | A:F835, A:D836, A:E837, A:A838, A:K839, A:L840, A:A841, A:E842, A:A843, A:R844, A:E845, A:M846, A:I847, A:R848, A:Y849, A:M850, A:A851, A:L852, A:V853, A:S854, A:A855, A:M856, A:E857, A:R858, A:T859, A:E860, A:H861, A:K862, A:A863, A:K864                                                                                                                                                                                                                                                                                                                                                                                                                                                                                                                                                                                                                                                                                                                                                                                                                                                                                                                                                                                         | 30                   | 0.971 |
| 2   | A:E831, A:G832, A:G833, A:D834                                                                                                                                                                                                                                                                                                                                                                                                                                                                                                                                                                                                                                                                                                                                                                                                                                                                                                                                                                                                                                                                                                                                                                                                         | 4                    | 0.941 |
| 3   | A:V753, A:M754, A:G755, A:I756, A:V757, A:G758, A:G759, A:V760, A:V761, A:S762, A:A763, A:V764, A:S765, A:G766, A:V767, A:S768, A:S769, A:F770                                                                                                                                                                                                                                                                                                                                                                                                                                                                                                                                                                                                                                                                                                                                                                                                                                                                                                                                                                                                                                                                                         | 18                   | 0.852 |
| 4   | A:G776, A:A777, A:L778, A:A779, A:V780, A:G781, A:L782, A:L783, A:V784, A:L785, A:A786, A:G787, A:L788, A:A789, A:A790, A:A791, A:F792, A:F793, A:A794, A:F795, A:R796, A:Y797, A:V798, A:M799, A:R800, A:L801, A:Q802, A:S803, A:N804, A:P805, A:M806, A:K807, A:A808, A:L809, A:Y810, A:P811, A:L812, A:T813, A:T814, A:K815                                                                                                                                                                                                                                                                                                                                                                                                                                                                                                                                                                                                                                                                                                                                                                                                                                                                                                         | 40                   | 0.762 |
| 5   | A:I104, A:K105, A:A106, A:E107, A:N108, A:T109, A:D110, A:A111, A:N112, A:F113, A:Y114, A:V115, A:C116, A:P117, A:P118, A:P119, A:T120, A:G121, A:A122, A:T123, A:V124, A:V125, A:Q126, A:F127, A:E541, A:R543, A:K544, A:L545, A:N546, A:P547, A:N548, A:A551, A:S552, A:V555, A:G556, A:R557, A:R558, A:V559, A:S560, A:A561, A:R562, A:M563, A:L564, A:G565, A:D566, A:V567, A:M568, A:A569, A:V570, A:S571, A:T572, A:C573, A:V574, A:P575, A:V576, A:A577, A:A578, A:D579, A:N580, A:V581, A:I582, A:V583, A:Q584, A:N585, A:S586, A:M587, A:R588, A:I589, A:S590, A:S591, A:R592, A:P593, A:G594, A:A595, A:C596, A:Y597, A:S598, A:R599, A:P600, A:L601, A:V602, A:S603, A:F604, A:R605, A:Y606, A:E607, A:D608, A:Q609, A:G610, A:P611, A:L612, A:V613, A:E614, A:G615, A:Q616, A:L617, A:G618, A:E619, A:N620, A:N621, A:E622, A:L623, A:R624, A:L625, A:T626, A:R627, A:D628, A:A629, A:I630, A:E631, A:P632, A:C633, A:T634, A:V635, A:G636, A:H637, A:R638, A:R639, A:Y640, A:F641, A:T642, A:F643, A:G644, A:G645, A:G646, A:Y647, A:V648, A:Y649, A:F650, A:E651, A:E652, A:Y653, A:A654, A:Y655, A:S656, A:H657, A:Q658, A:L659, A:S660, A:R661, A:A662, A:D663, A:I664, A:T665, A:T666, A:V667, A:S668, A:T669, A:F670 | 149                  | 0.746 |
| 6   | A:D713, A:L714, A:A717, A:D718, A:I719, A:D720, A:T721, A:V722, A:I723, A:H724, A:A725                                                                                                                                                                                                                                                                                                                                                                                                                                                                                                                                                                                                                                                                                                                                                                                                                                                                                                                                                                                                                                                                                                                                                 | 11                   | 0.713 |
| 7   | A:L399, A:F425, A:A426, A:R427, A:R428, A:Y429, A:N430, A:A431, A:T432, A:H433, A:I434, A:K435, A:V436, A:G437, A:Q438, A:P439, A:Q453, A:P454, A:L455, A:L456, A:S457, A:N458, A:T459, A:L460, A:A461, A:E462, A:L463, A:Y464, A:V465, A:R466, A:E467, A:H468, A:L469, A:R470, A:E471, A:Q472, A:S473, A:R474                                                                                                                                                                                                                                                                                                                                                                                                                                                                                                                                                                                                                                                                                                                                                                                                                                                                                                                         | 38                   | 0.674 |
| 8   | A:W174, A:F175, A:G176, A:H177, A:R178, A:Y179, A:S180, A:R258, A:V259, A:E260, A:A261, A:F262                                                                                                                                                                                                                                                                                                                                                                                                                                                                                                                                                                                                                                                                                                                                                                                                                                                                                                                                                                                                                                                                                                                                         | 12                   | 0.59  |
| 9   | A:I198, A:D199, A:K200, A:I201, A:N202, A:A203, A:K204, A:G205, A:E233, A:L234, A:K235, A:Y301, A:G302, A:Y303, A:R304, A:E305, A:G306, A:S307, A:H308, A:T309, A:Q321, A:V322, A:D323, A:G324, A:F325, A:Y326, A:A327, A:R328, A:D329, A:L330, A:T331, A:T332, A:K333, A:A334, A:R335, A:A336, A:T337, A:A338, A:P339, A:T340, A:T341, A:W356                                                                                                                                                                                                                                                                                                                                                                                                                                                                                                                                                                                                                                                                                                                                                                                                                                                                                         | 42                   | 0.571 |
| 10  | A:T400, A:E401, A:K475, A:P476                                                                                                                                                                                                                                                                                                                                                                                                                                                                                                                                                                                                                                                                                                                                                                                                                                                                                                                                                                                                                                                                                                                                                                                                         | 4                    | 0.57  |
| 11  | A:D419, A:D422, A:R423                                                                                                                                                                                                                                                                                                                                                                                                                                                                                                                                                                                                                                                                                                                                                                                                                                                                                                                                                                                                                                                                                                                                                                                                                 | 3                    | 0.549 |

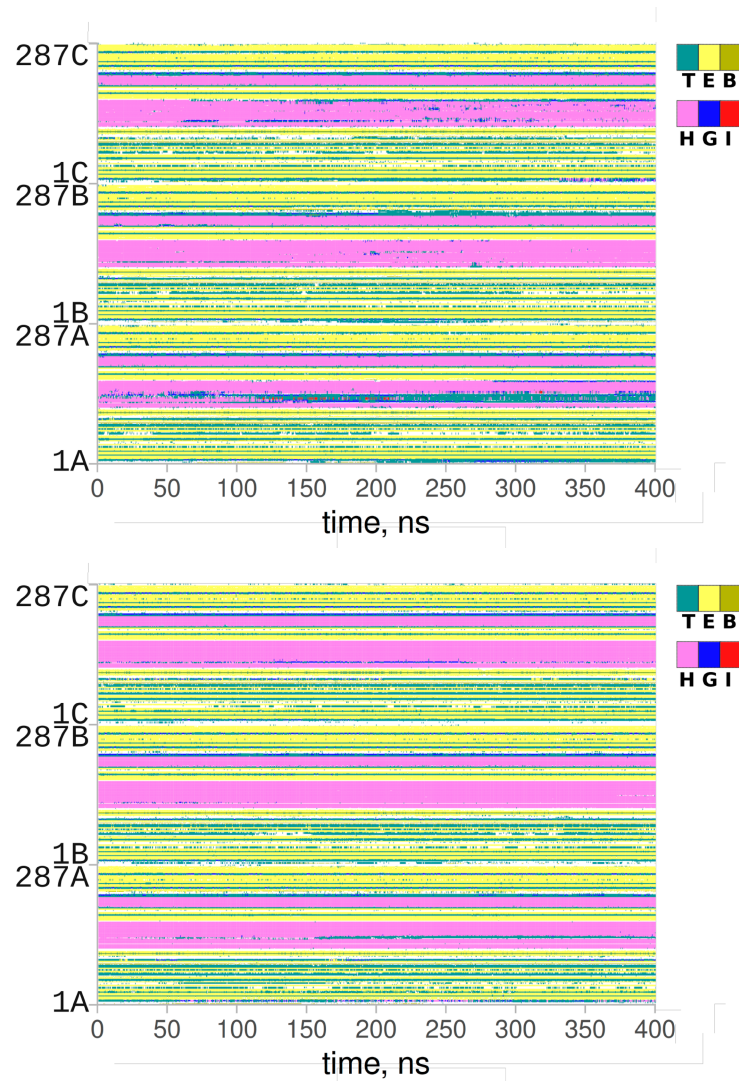

**Figure S1.** Time-evolution of the secondary structure throughout the MD trajectory in all monomers of the subIHA trimer. The results of two independent experiments performed using the Amber-18 simulation package with the ff99SB-ildn and ff19SB force fields are shown in the top and bottom panels, respectively. Secondary structure elements were assigned according to VMD (Humphrey, Dalke, & Schulten, 1996). The elements of secondary structures are colored according to the legend: a-helix, H; 3-10-helix, G; extended conformation ( $\beta$ ), E; turn, T; isolated bridge, B; coil (none of the above), uncolored.
